# Supplementary material
Source: PubMed Central journal article supplement (PMC5087721)
Supplement: 10.1074_M116.748954_jbc.M116.748954-1.pdf [file 10.1074_M116.748954_jbc.M116.748954-1.pdf]

**Multiple transcriptional factors regulate transcription of the *rpoE* gene in *Escherichia coli* under different growth conditions and when the lipopolysaccharide biosynthesis is defective**

**Gracjana Klein\*<sup>1</sup>, Anna Stupak\*<sup>1</sup>, Daria Biernacka<sup>1</sup>, Pawel Wojtkiewicz<sup>1</sup>, Buko Lindner<sup>2</sup>, and Satish Raina<sup>1</sup>**

From the <sup>1</sup>Unit of Bacterial Genetics, Gdansk University of Technology, Narutowicza 11/12, 80-233, Gdansk, Poland, and

<sup>2</sup>Research Center Borstel, Leibniz-Center for Medicine and Biosciences, Parkallee 22, 23845 Borstel, Germany

Running title: *RpoN-, RpoD- and RpoS-dependent control of the rpoE transcription*

To whom correspondence should be addressed: Satish Raina: [satish.raina@pg.gda.pl](mailto:satish.raina@pg.gda.pl) Tel.: 48-58-347-2618; Unit of Bacterial Genetics, Gdansk University of Technology, Narutowicza 11/12, 80-233 Gdansk, Poland

**Keywords:** Lipopolysaccharide, RNA polymerase, RpoE, RpoN, transcription termination, glycosyltransferase, RirA sRNA, Qse and Rcs two-component systems, lipoprotein, LapB

**Supplemental information**

**Table S1.** Bacterial strains and plasmids used in this study

| Strains/Plasmids | Relevant characteristic                                                                                                                                                               | Reference or source |
|------------------|---------------------------------------------------------------------------------------------------------------------------------------------------------------------------------------|---------------------|
| Strains          |                                                                                                                                                                                       |                     |
| BW25113          | <i>lacI</i> <sup>q</sup> <i>rrnB</i> <sub>T14</sub> $\Delta$ <i>lacZ</i> <sub>WJ16</sub> <i>hsdR514</i> $\Delta$ <i>araBAD</i> <sub>AH33</sub> $\Delta$ <i>rhaBAD</i> <sub>LD78</sub> | (62)                |
| MC4100           | F <sup>-</sup> <i>araD139</i> $\Delta$ ( <i>argF-lac</i> ) U169                                                                                                                       | Our collection      |
| BL21(DE3)        | F <sup>-</sup> <i>ompT hsdSB(rB<sup>-</sup> mB<sup>-</sup>) gal dcm</i> (DE3)                                                                                                         | Invitrogen          |
| GK1942           | BW25113 (pKD46)                                                                                                                                                                       | (9)                 |
| SR4245           | MC4100 $\phi$ ( <i>rpoEP1-P5-lacZ</i> )                                                                                                                                               | This study          |
| SR7917           | BW25113 $\phi$ ( <i>rpoEP1-P5-lacZ</i> )                                                                                                                                              | This study          |
| SR18647          | BW25113 $\phi$ ( <i>rpoEP1-lacZ</i> )                                                                                                                                                 | This study          |
| SR18868          | BW25113 $\phi$ ( <i>rpoEP2/P3-lacZ</i> )                                                                                                                                              | This study          |
| SR18987          | BW25113 $\phi$ ( <i>rpoEP2*-lacZ</i> ) -12 and -24 mut                                                                                                                                | This study          |
| SR19089          | BW25113 $\phi$ ( <i>rpoEP3*-lacZ</i> ) -7C -11G                                                                                                                                       | This study          |
| SR18874          | BW25113 $\phi$ ( <i>rpoEP4-lacZ</i> )                                                                                                                                                 | This study          |
| SR18583          | BW25113 $\phi$ ( <i>rpoEP5-lacZ</i> )                                                                                                                                                 | This study          |
| SR10074          | SR4245 <i>waaC</i> ::Tn10                                                                                                                                                             | This study          |
| SR10182          | SR7917 <i>waaC</i> ::Tn10                                                                                                                                                             | This study          |
| SR10396          | SR7917 <i>waaF</i> ::Tn10                                                                                                                                                             | This study          |
| SR10401          | SR7917 <i>rfaH</i> ::Tn10                                                                                                                                                             | This study          |
| SR17505          | SR7917 <i>rssB</i> ::Tn10                                                                                                                                                             | This study          |
| SR8035           | W3110 <i>waaC</i> $\langle$ <i>aph</i>                                                                                                                                                | (6)                 |
| SR8233           | W3110 <i>waaC</i> $\langle$ <i>cat</i>                                                                                                                                                | (6)                 |
| GK2876           | SR7917 <i>rpoS</i> $\langle$ <i>aph</i>                                                                                                                                               | This study          |
| GK2880           | SR7917 <i>rpoN</i> $\langle$ <i>aph</i>                                                                                                                                               | This study          |
| GK2905           | SR7917 <i>rpoN</i> $\langle$ <i>aph waaC</i> $\langle$ <i>cat</i>                                                                                                                     | This study          |
| GK2986           | SR7917 <i>crp</i> $\langle$ <i>aph</i>                                                                                                                                                | This study          |
| GK2864           | SR7917 <i>waaC</i> $\langle$ <i>cat</i>                                                                                                                                               | This study          |
| GK2868           | SR7917 <i>waaC</i> $\langle$ <i>aph</i>                                                                                                                                               | This study          |
| GK4691           | SR7917 <i>waaP</i> $\langle$ <i>aph</i>                                                                                                                                               | This study          |
| GK4732           | SR7917 <i>waaF</i> $\langle$ <i>aph</i>                                                                                                                                               | This study          |

|         |                                                         |            |
|---------|---------------------------------------------------------|------------|
| GK4755  | SR7917 <i>waaG</i> ◊ <i>aph</i>                         | This study |
| GK4762  | SR7917 <i>rfaH</i> ◊ <i>aph</i>                         | This study |
| SR10438 | SR7917 <i>ntrC</i> ◊ <i>aph</i>                         | This study |
| SR15415 | SR7917 <i>rcsB</i> ◊ <i>aph</i>                         | This study |
| SR15422 | SR7917 <i>rcsB</i> ◊ <i>cat</i>                         | This study |
| SR15506 | SR7917 <i>rssB</i> ◊ <i>aph</i>                         | This study |
| SR15890 | SR7917 <i>arcA</i> ◊ <i>aph</i>                         | This study |
| SR15894 | SR7917 <i>arcB</i> ◊ <i>aph</i>                         | This study |
| SR17500 | SR7917 <i>cya</i> ◊ <i>aph</i>                          | This study |
| SR18577 | SR7917 <i>ecfLM</i> ◊ <i>aph</i>                        | This study |
| SR19015 | SR7917 <i>lapA-lapB</i> ◊ <i>aph</i>                    | This study |
| SR19027 | SR7917 <i>rcsB</i> ◊ <i>cat lapA-lapB</i> ◊ <i>aph</i>  | This study |
| JW5702  | BW25113 <i>crp</i> ◊ <i>aph</i>                         | (33)       |
| JW5437  | BW25113 <i>rpoS</i> ◊ <i>aph</i>                        | (33)       |
| GK1943  | BW25113 <i>waaP</i> ◊ <i>aph</i>                        | This study |
| GK2048  | BW25113 <i>waaF</i> ◊ <i>cat</i>                        | This study |
| SR7938  | BW25113 <i>waaO</i> ◊ <i>aph</i>                        | This study |
| SR7946  | BW25113 <i>waaF</i> ◊ <i>aph</i>                        | This study |
| SR8021  | BW25113 <i>waaG</i> ◊ <i>aph</i>                        | This study |
| SR15695 | BW25113 <i>rcsF</i> ◊ <i>aph</i>                        | This study |
| SR17187 | BW25113 <i>lapA-lapB</i> ◊ <i>aph</i>                   | (9)        |
| SR18718 | BW25113 <i>qseF</i> ◊ <i>aph</i>                        | This study |
| SR9237  | BW25113 <i>waaO</i> ::3xFLAG◊ <i>frit</i>               | (9)        |
| SR16215 | BW25113 <i>waaC</i> ::3xFLAG◊ <i>frit</i>               | (9)        |
| SR17110 | BW25113 <i>rfaB</i> ::3xFLAG◊ <i>frit</i>               | This study |
| GK4798  | SR18987 <i>lapA-lapB</i> ◊ <i>aph</i>                   | This study |
| GK4803  | SR18987 <i>rcsB</i> ◊ <i>cat lapA-lapB</i> ◊ <i>aph</i> | This study |
| SR18989 | SR18987 <i>crp</i> ◊ <i>aph</i>                         | This study |
| SR18990 | SR18987 <i>waaC</i> ◊ <i>cat</i>                        | This study |
| SR18993 | SR18987 <i>rcsB</i> ◊ <i>cat</i>                        | This study |
| SR18997 | SR18987 <i>rcsB</i> ◊ <i>cat waaC</i> ◊ <i>aph</i>      | This study |
| SR19001 | SR18987 <i>waaF</i> ◊ <i>aph</i>                        | This study |
| SR19077 | SR18987 <i>waaG</i> ◊ <i>aph</i>                        | This study |
| SR19079 | SR18987 <i>waaP</i> ◊ <i>aph</i>                        | This study |
| SR19083 | SR18987 <i>waaO</i> ◊ <i>cat</i>                        | This study |
| SR18991 | SR18987 <i>ecfLM</i> ◊ <i>aph</i>                       | This study |
| SR18936 | SR18874 <i>rpoS</i> ◊ <i>aph</i>                        | This study |
| SR19013 | SR18874 <i>rssB</i> ◊ <i>aph</i>                        | This study |
| SR19110 | SR19089 <i>qseF</i> ◊ <i>aph</i>                        | This study |
| SR19112 | SR19089 <i>rpoN</i> ◊ <i>aph</i>                        | This study |
| GK4815  | SR19089 <i>qseF</i> ◊ <i>aph waaC</i> ◊ <i>cat</i>      | This study |
| SR19055 | SR19089 <i>waaC</i> ◊ <i>cat</i>                        | This study |
| SR19060 | SR19089 <i>rpoN</i> ◊ <i>aph waaC</i> ◊ <i>cat</i>      | This study |
| GK4853  | BW25113 + pMF19 + pRS551                                | This study |
| GK4860  | BW25113 + pMF19 + pSR9446                               | This study |

Plasmids

|        |                                                                      |         |
|--------|----------------------------------------------------------------------|---------|
| pET28b | expression vector                                                    | Novagen |
| pET22b | expression vector                                                    | Novagen |
| pMF19  | expresses WbbL rhamnosyltransferase sp <sup>R</sup>                  | (52)    |
| pCP20  | ts replicon with inducible FLP recombinase                           | (62)    |
| pKD3   | <i>oriR6K<sub>g</sub>, bla(Amp<sup>R</sup>), kan, rgnB(Ter), cat</i> | (62)    |
| pKD13  | <i>oriR6K<sub>g</sub>, bla(Amp<sup>R</sup>), kan, rgnB(Ter)</i>      | (62)    |
| pKD46  | <i>araBp-gam-bet-exo, bla(Amp<sup>R</sup>), repA101(ts)</i>          | (62)    |

|          |                                                    |            |
|----------|----------------------------------------------------|------------|
| pRS415   | <i>lacZYA</i> transcriptional fusion vectors       | (63)       |
| pRS550   | <i>lacZYA</i> transcriptional fusion vectors       | (63)       |
| pRS551   | <i>lacZYA</i> transcriptional fusion vectors       | (63)       |
| pCA24N   | IPTG-inducible expression vector $cm^R$            | (34)       |
| JW5808   | <i>pcnB</i> <sup>+</sup> in pCA24N $cm^R$          | (34)       |
| pSR9443  | <i>virA</i> <sup>+</sup> in pOK12 $kan^R$          | This study |
| pSR9446  | <i>virA</i> <sup>+</sup> in pRS551 $kan^R$ $amp^R$ | This study |
| pSR18213 | <i>virA</i> <sup>*</sup> in pSR9446                | This study |
| pSR18976 | <i>ntnC</i> <sup>+</sup> in pET28b $kan^R$         | This study |
| pGK4661  | <i>rcsA</i> <sup>+</sup> in pET22b $amp^R$         | This study |
| pGK4662  | <i>rcsB</i> <sup>+</sup> in pET22b $amp^R$         | This study |
| pSR16691 | <i>rpoS</i> <sup>+</sup> in pET24b $kan^R$         | This study |
| pSR16739 | <i>crp</i> <sup>+</sup> in pET22b $amp^R$          | This study |
| pSR13036 | <i>qseF</i> <sup>+</sup> in pET28b $kan^R$         | This study |
| pSR13274 | <i>qseG</i> <sup>+</sup> in pCA24N $cm^R$          | This study |
| pSR14321 | <i>yhdV</i> <sup>+</sup> in pCA24N $cm^R$          | This study |
| JW3169   | <i>rpoN</i> <sup>+</sup> in pCA24N $cm^R$          | (34)       |
| JW3818   | <i>rfaH</i> <sup>+</sup> in pCA24N $cm^R$          | (34)       |
| pSR18621 | <i>rpoEP1-lacZ</i> in pRS551 $kan^R$ $amp^R$       | This study |
| pGK4838  | <i>rpoEP3*-lacZ</i> (-7C -11G) in pRS551           | This study |
| pSR18980 | <i>rpoEP2*-lacZ</i> (-12 and -24 mut) in pRS550    | This study |
| pSR18854 | <i>rpoEP2-P3-lacZ</i> in pSR415 $amp^R$            | This study |
| pSR18861 | <i>rpoEP4-lacZ</i> in pRS415 $amp^R$               | This study |
| pSR18569 | <i>rpoEP5-lacZ</i> in pRS550 $kan^R$ $amp^R$       | This study |

**Table S2.** Primers

**For gene disruptions:**

|          |                                                                                                      |
|----------|------------------------------------------------------------------------------------------------------|
| waaG_for | 5'-AAG CTG TTG CCA GAA GAT GCC CCT TCA GCT GAC AGG AAT GCA CAA TTA TGA TTC CGG GGA TCC GTC GAC C-3'  |
| waaG_rev | 5'-GCC AAA GTG TGG CAA GCG GCT CTT TTA ATT CAA CCA TCT AAA CCA CCT GTT GTA GGC TGG AGC TGC TTC G -3' |
| waaP_for | 5'-GTA TAG CTT GCC AGA AAA AGC CGC GGA TAT CAT TAC AGG TGG TTT AGA TGA TTC CGG GGA TCC GTC GAC C-3'  |
| waaP_rev | 5'-TTA GTT CCA GTA CAT ACT AAT AAA TAT TTT TAT AAT CCT TTG CGT TGT GTT GTA GGC TGG AGC TGC TTC G-3'  |
| rfaH_for | 5'-AAA GCT TTT GCT ATC CTT GCG CCC CGA TTA AAC GGA TAA GAG TCA TTA TGA TTC CGG GGA TCC GTC GAC C-3'  |
| rfaH_rev | 5'-AAT GTC AAA ACA CTG TTT GGG ATT GCG TTT TAG AGT TTG CGG AAC TCG GTT GTA GGC TGG AGC TGC TTC G-3'  |
| waaF_for | 5'-CAT GGC CTG GCT GAA TCG CGA CGC ATA AGA GCT CTG CAT GCA TAT GAA TAT CCT CCT TAG-3'                |
| waaF_rev | 5'-CGA TCA AAA CCC GCA TCC GTC AGG CTT CCT CTT GTA ACA AGT GTA GGC TGG AGC TGC TTC-3'                |
| resAF    | 5'-TAT TCA GGT AAG GGG AAT TAT CGT TAC GCA TTG AGT GAG GGT ATG CCA TGA TTC CGG GGA TCC GTC GAC C-3'  |
| resAR    | 5'-ACT GGT GGG AAA CCA CCA GTC AGA ATG TGT TAG CGC ATG TTG ACA AAA ATT GTA GGC TGG AGC TGC TTC G-3'  |
| resBF    | 5'-CAT TGA CAG TTA TGT CAA GAG CTT GCT GTA GCA AGG TAG CCT ATT ACA TGA TTC CGG GGA TCC GTC GAC C-3'  |
| resBR    | 5'-CTA ACG CGT CTT ATC TGG CCT ACA GGT GAT TAG TCT TTA TCT GCC GGA CTT GTA GGC TGG AGC TGC TTC G-3'  |
| resF-F   | 5'-GCT CCT GAT TCA ATA TTG ACG TTT TGA TCA TAC ATT GAG GAA ATA CTA TGA TTC CGG GGA TCC GTC GAC C-3'  |
| resF-R   | 5'-AAC GCC TAT TTG CTC GAA CTG GAA ACT GCT CAT TTC GCC GTA ATG TTA AGT GTA GGC TGG AGC TGC TTC G-3'  |
| ecfL_for | 5'-ATC TTT TAA AAC CAG CGT GGC GTT AAC CGA TTC ACC AGG AAT AAT GAA TGA TTC CGG GGA TCC GTC GAC C-3'  |
| ecfM_rev | 5'-GTG AGT GAT ATG TTT CGG ATA ACA GGA AGT TAT CCG AAG CGA TGA GAG TTT GTA GGC TGG AGC TGC TTC G-3'  |

**For cloning and overexpression of specific genes:**

|          |                                                   |
|----------|---------------------------------------------------|
| NtrC_F   | 5'-AGG TGA CGC ATA TGC AAC GAG GGA TAG-3'         |
| NtrC_R   | 5'-CTT TAC ACA CAA GCT GTC TCG AGC TCC ATC C-3'   |
| crpP_For | 5'-CAG AGG ATA ACC GCA TAT GGT GCT TGG CAA ACC-3' |
| crp_Rev  | 5'-CCA CTC CGA CGC TCG AGA CGA GTG CCG TAA ACG-3' |
| resA_For | 5'-GTG AGG GTA TCA TAT GTC AAC GAT TA-3'          |
| resA_Rev | 5'-CAC CAG TCA GAA TCT CGA GGC GCA TGT TGA C-3'   |
| rirA_Rev | 5'-GGC TCA ACA GGA TCC TGA ATA CTG ATA AC-3'      |
| rirA_FE  | 5'-GCG AAA GAA ATG ATA GAA TTC CAC GTC-3'         |
| rirA_RH  | 5'-CTT TAT GAC CAA GCT TTT TCG AAA TGG C-3'       |

**For promoter cloning:**

|         |                                                     |
|---------|-----------------------------------------------------|
| P1-P5 F | 5'-CTG GCG ACG AAT TCA ACT GCA-3'                   |
| P1-P5 R | 5'-GTT CCG TAA CGG ATC CGT TTT TGT T-3'             |
| P1 F    | 5'-GTA GCG CCA GTG GAA TTC CGG CTG-3'               |
| P1 R    | 5'-CGC ACA ACA GGA TCC TAT GCT GAC-3'               |
| P2/P3 F | 5'-GGT TTG GTG AAT TCA GCA TCA TGT TGT GCG GAT A-3' |

*RpoN-, RpoD- and RpoS-dependent control of the rpoE transcription*

P2/P3 R 5'-CCT AAT CCT CCA GGA TCC AGT AAC TTC-3'  
P4 F 5'-GTT ACA GTT GCT GAA TTC GCT GAC GCA GG -3'  
P4 R 5'-GAA CAT CGG ATC CTC TGT GTA G-3'  
P5 F 5'-AGT TAA ATG GGC ATT TC-3'  
P5 R 5'-GTT CCG TAA CGC ATC TG-3'  
P3 mut F 5'-CTA AAC AGA ATT CGG TCA GCA TAG CAT CAT GTT GTG CGG ATA  
AAC ACC TGC TGT TTC AAT ATT TGT TAC AG-3'  
P2 mut F 5'-GGT CAG CAT AGC ATC ATG TTG TGC GAA TAA ACA CCT ATT ATT  
TTA ATA TTT GTT ACA G-3'

**For promoter mapping:**

P1\_Race1 5'-CTC CCC AAA CCA AAT TTC CAC GC-3'  
P1\_Race2 5'-GTA AAG TTC CGT AAC GCA TCT G-3'

**For gel shifts:**

P1FL 5'-GGT TTG GTG AAT TCA GCA TCA TGT TGT GCG GAT A-3'  
P1FS 5'-AAA AGA GAA TTC ACT GGC TGG TGG A-3'  
P2/P3 R 5'-CCT AAT CCT CCA GGA TCC AGT AAC TTC-3'  
P1BH\_R 5'-CGC ACA ACA GGA TCC TAT GCT GAC-3'  
RpoN\_WF 5'-GGT CAG CAT AGC ATC ATG TTG TGC GGA TAA ACA CCT GCT ATT  
TTA ATA TTT GTT ACA G-3'  
GFP1\_FOR 5'-AGT GAA AGT CCG GCT GCG CCG CTA-3'  
GFP2\_FOR 5'-GAA TGT TCA GGG AGA GTA TTC-3'  
GFP3\_FOR 5'-CTA AAC ATG GTT TGG TCA GC-3'  
GFN\_REV 5'-CCT CCA CCA GCC AGT AAC TTC-3'
